# Supplementary material for: Breaking Barriers in Crosslinking Mass Spectrometry: Enhanced Throughput and Sensitivity with the Orbitrap Astral Mass Analyzer
Source: Research Square preprint supplement (doi:10.21203/rs.3.rs-6114909/v1), 2025-07-30
Supplement: Supplementary file 2 [file c8ce963140a17d4eb0bea854.xlsx]

## Sheet: Sheet1
Number	Peptide	Fwhm PepMap [min]	Fwhm Aurora [min]	Total Area MS1 PepMap	Total Area MS1 Aurora	RT PepMap [min]	RT Aurora [min]
Peptide 1	DKQSGK-GQKNSR	0.04	0.01	384834	56414	19.04	19.07
Peptide 2	LKGSPEDNEQK-ENQTTQKGQK	0.05	0.04	32013588	74729416	26.24	19.57
Peptide 3	KTEVQTGGFSKESILPK-KKDWDPK	0.13	0.06	140716656	215282752	40.68	39.56
Peptide 4	KSEETITPWNFEEVVDK-VNTEITKAPLSASMIK	0.07	0.03	48642140	116787680	59.93	60.02
Peptide 5	KSEETITPWNFEEVVDK-GILQTVKVVDELVK	0.06	0.02	26931036	114245240	70.41	70.72
